# Supplementary material for: Process Evaluation of a Wireless Wearable Continuous Vital Signs Monitoring Intervention in 2 General Hospital Wards: Mixed Methods Study
Source: PubMed Central journal article supplement (PMC10196902; doi:10.2196/44061), 2023-05-04
Supplement: nursing_v6i1e44061_app3.pdf [file nursing_v6i1e44061_app3.pdf]

### MULTIMEDIA APPENDIX 3: Example of the Philips Intellivue Guardian Solution (IGS) dashboard

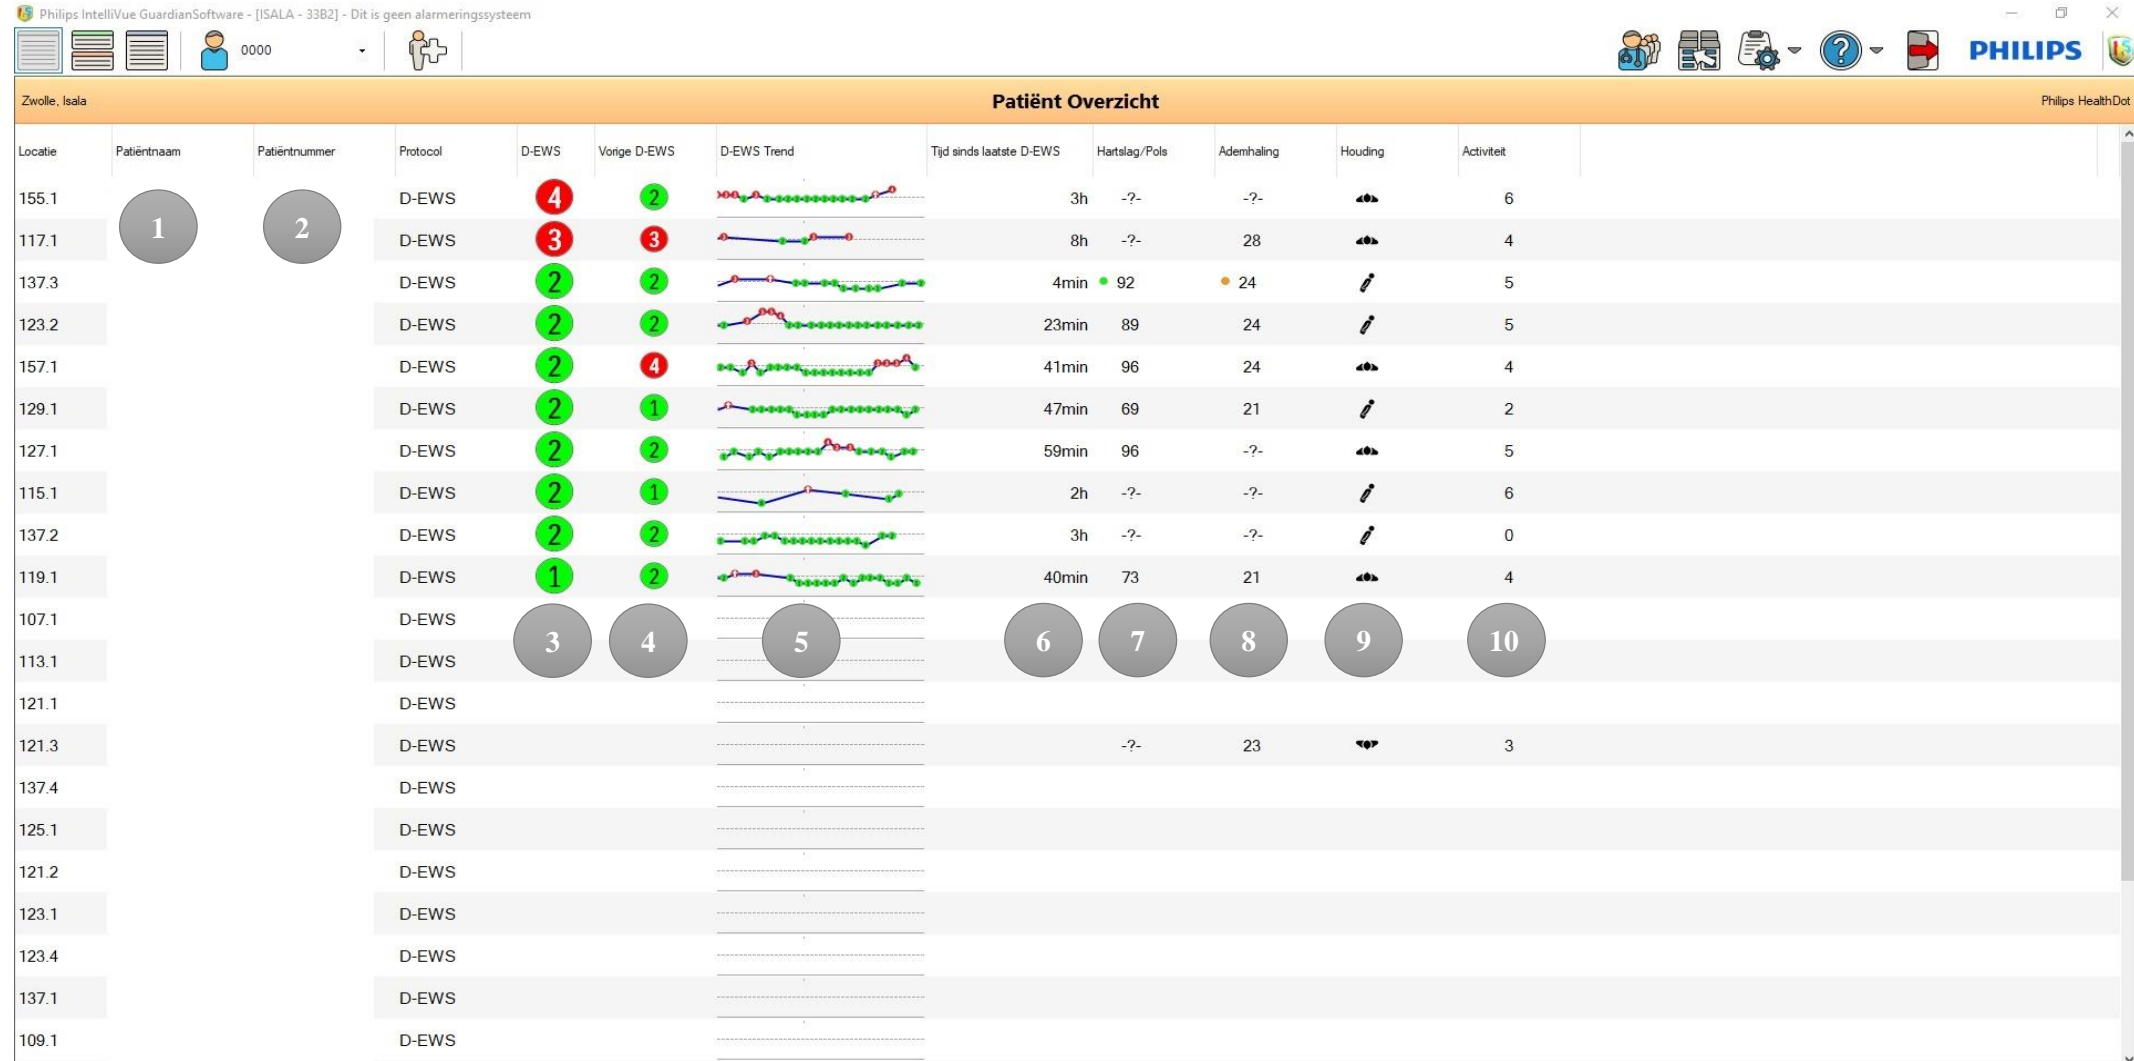

1: Patient's name, 2: Patient ID, 3: latest D-EWS score, 4: previous D-EWS score, 5: trend of D-EWS scores over a period of 24 hours, 6: Time since latest D-EWS score, 7: latest heartrate measurement, 8: latest respiratory rate measurement, 9: latest posture measurement, 10: latest activity score
